# Supplementary material for: Effect of surface morphology changes of Ti-6Al-4V alloy modified by laser treatment on GDOES elemental depth profiles
Source: Royal Society of Chemistry journal article supplement (doi:10.1039/c2ja30186e), 2012-11-02
Supplement: c2ja30186e.pdf [file c2ja30186e.pdf]

### Supplementary Information 1.

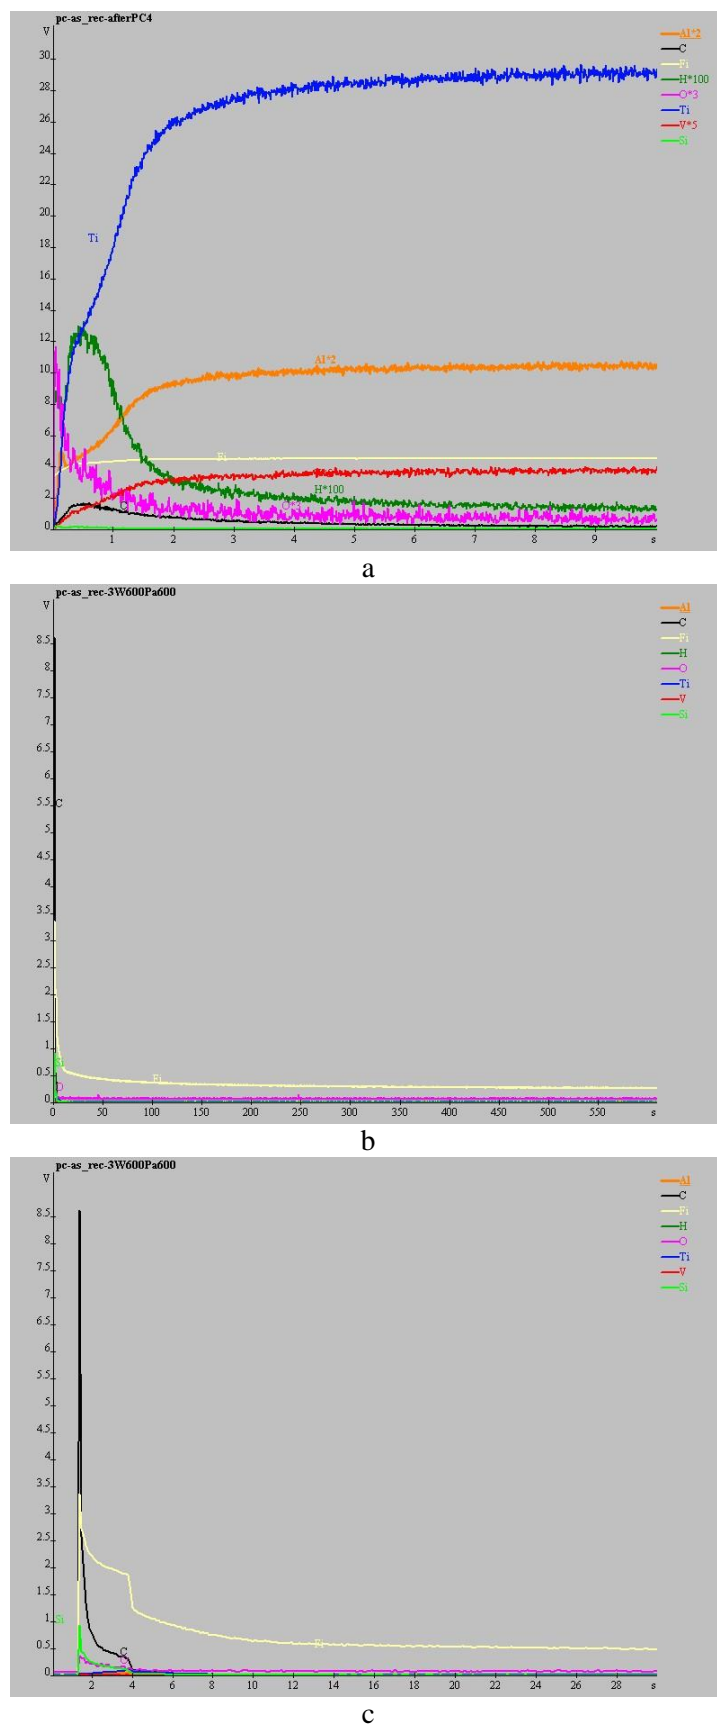

**Figure 1.** (a) GDOES elemental depth profile of the Ti-6Al-4V alloy after plasma cleaning at 600 Pa, 3 W for 600 s. Initially, power for plasma cleaning was pre-set at 5 W because the instrument does not allow pre-setting power below 5 W. The power was switched to 3 W after approximately 3 seconds of cleaning. (b) Elemental depth profile during plasma cleaning; (c) depth profile showing the first 30 s of (b).
